# Supplementary material for: Loss of Gnas Imprinting Differentially Affects REM/NREM Sleep and Cognition in Mice
Source: PubMed Central journal article supplement (PMC3349741; doi:10.1371/journal.pgen.1002706), 2012-05-10

a

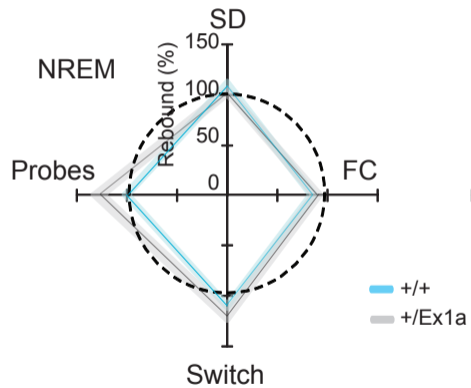

b

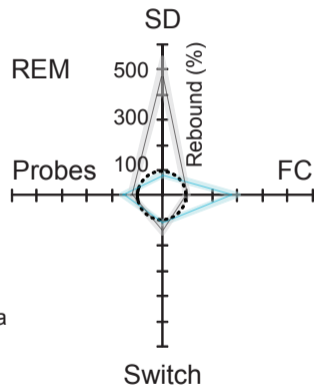

c

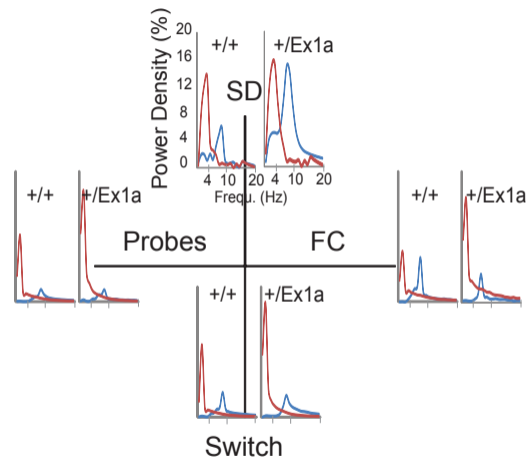

Supplement: pgen.1002706.s001.pdf [file pgen.1002706.s001.pdf]
